# Supplementary material
Source: publisher figshare collection journal article supplement (https://gsajournals.figshare.com/ndownloader/files/21749259)

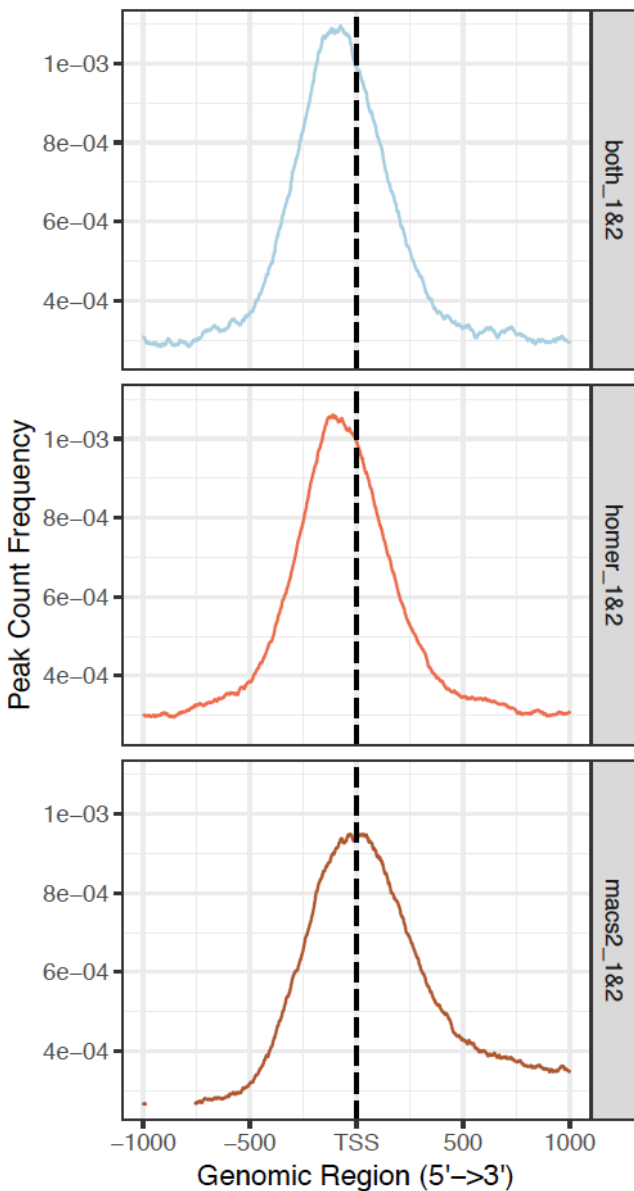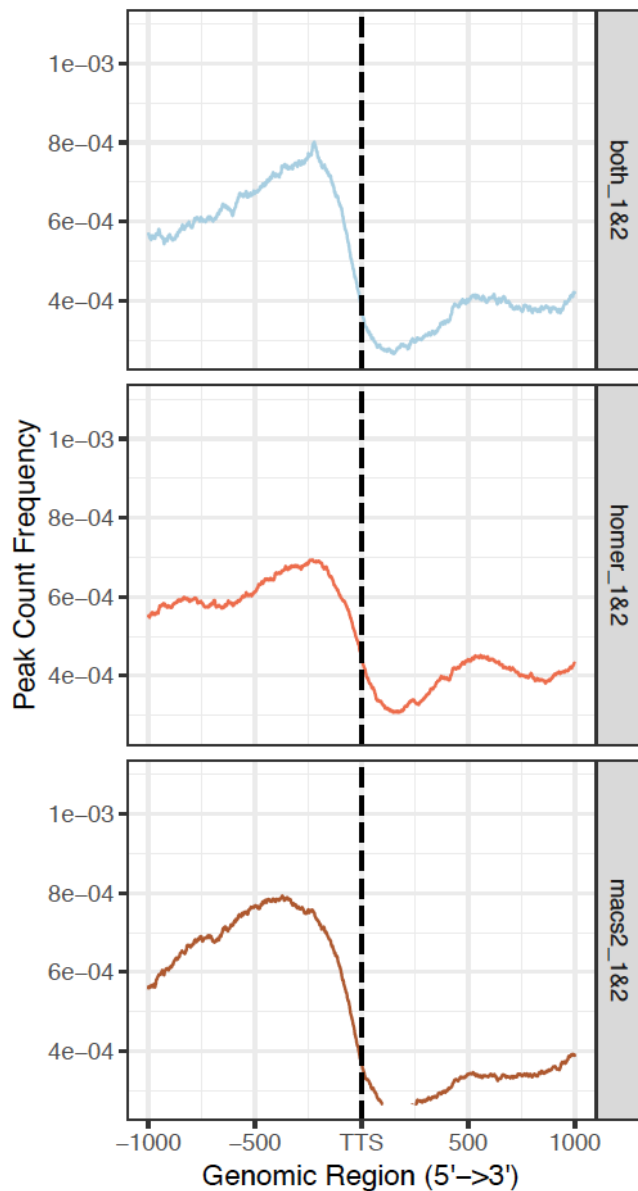

— both\_1&2 — homer\_1&2 — macs2\_1&2

— both\_1&2 — homer\_1&2 — macs2\_1&2

Supplement: Supplementary file 1 [file 21749259]
